# Supplementary material for: Impact of Hypermannosylation on the Structure and Functionality of the ER and the Golgi Complex
Source: MDPI journal article supplement (doi:10.3390/biomedicines11010146), 2023-01-06
Supplement: s1 [file s1]

*Supplemental Material*

## Impact of Hypermannosylation on the Structure and Functionality of the ER and the Golgi Complex

Patricia Franzka <sup>1,\*</sup>, Svenja Caren Schöler <sup>2</sup>, Takfarinas Kentache <sup>3</sup>, Robert Storm <sup>4</sup>, Andrea Bock <sup>1</sup>, Istvan Katona <sup>5</sup>, Joachim Weis <sup>5</sup>, Katrin Buder <sup>2</sup>, Christoph Kaether <sup>2</sup> and Christian A. Hübner <sup>1,\*</sup>

<sup>1</sup> Institute of Human Genetics, University Hospital Jena, 07747 Jena, Germany

<sup>2</sup> Leibniz-Institute on Aging—Fritz-Lipmann-Institute, 07745 Jena, Germany

<sup>3</sup> De Duve Institute, UCLouvain, BE-1200 Woluwe-Saint-Lambert, Belgium

<sup>4</sup> Molecular Devices, 81377 München, Germany

<sup>5</sup> Institute of Neuropathology, RWTH Aachen University Hospital, 52074 Aachen, Germany

\* Correspondence: patricia.franzka@med.uni-jena.de (P.F.); christian.huebner@med.uni-jena.de (C.A.H.)

**Supplementary Materials:** The following supporting information can be downloaded at: [www.mdpi.com/xxx/s1](http://www.mdpi.com/xxx/s1). Figure S1: Quantitative changes of proteins necessary for ER and Golgi organization and function in GMPPA KO skeletal muscle and brain compared to WT upon Con A pulldown; S2: Significantly altered ER- and Golgi-resident proteins in GMPPA KO mice upon Con A pulldown; S3: Protein interaction network of Con A enriched proteins necessary for ER and Golgi function and organization; Figure S4: Example for ComDet analysis in ImageJ; Figure S5: Mannose levels are increased in the supernatant of GMPPA KO MEFs; Figure S6: Increased mannosylation in WT MEFs treated with mannose; Table S1: ER- and Golgi-resident proteins.

Raw figures can be found at: <https://cloud.med.uni-jena.de/index.php/s/E775K6h9zsGOzr1>

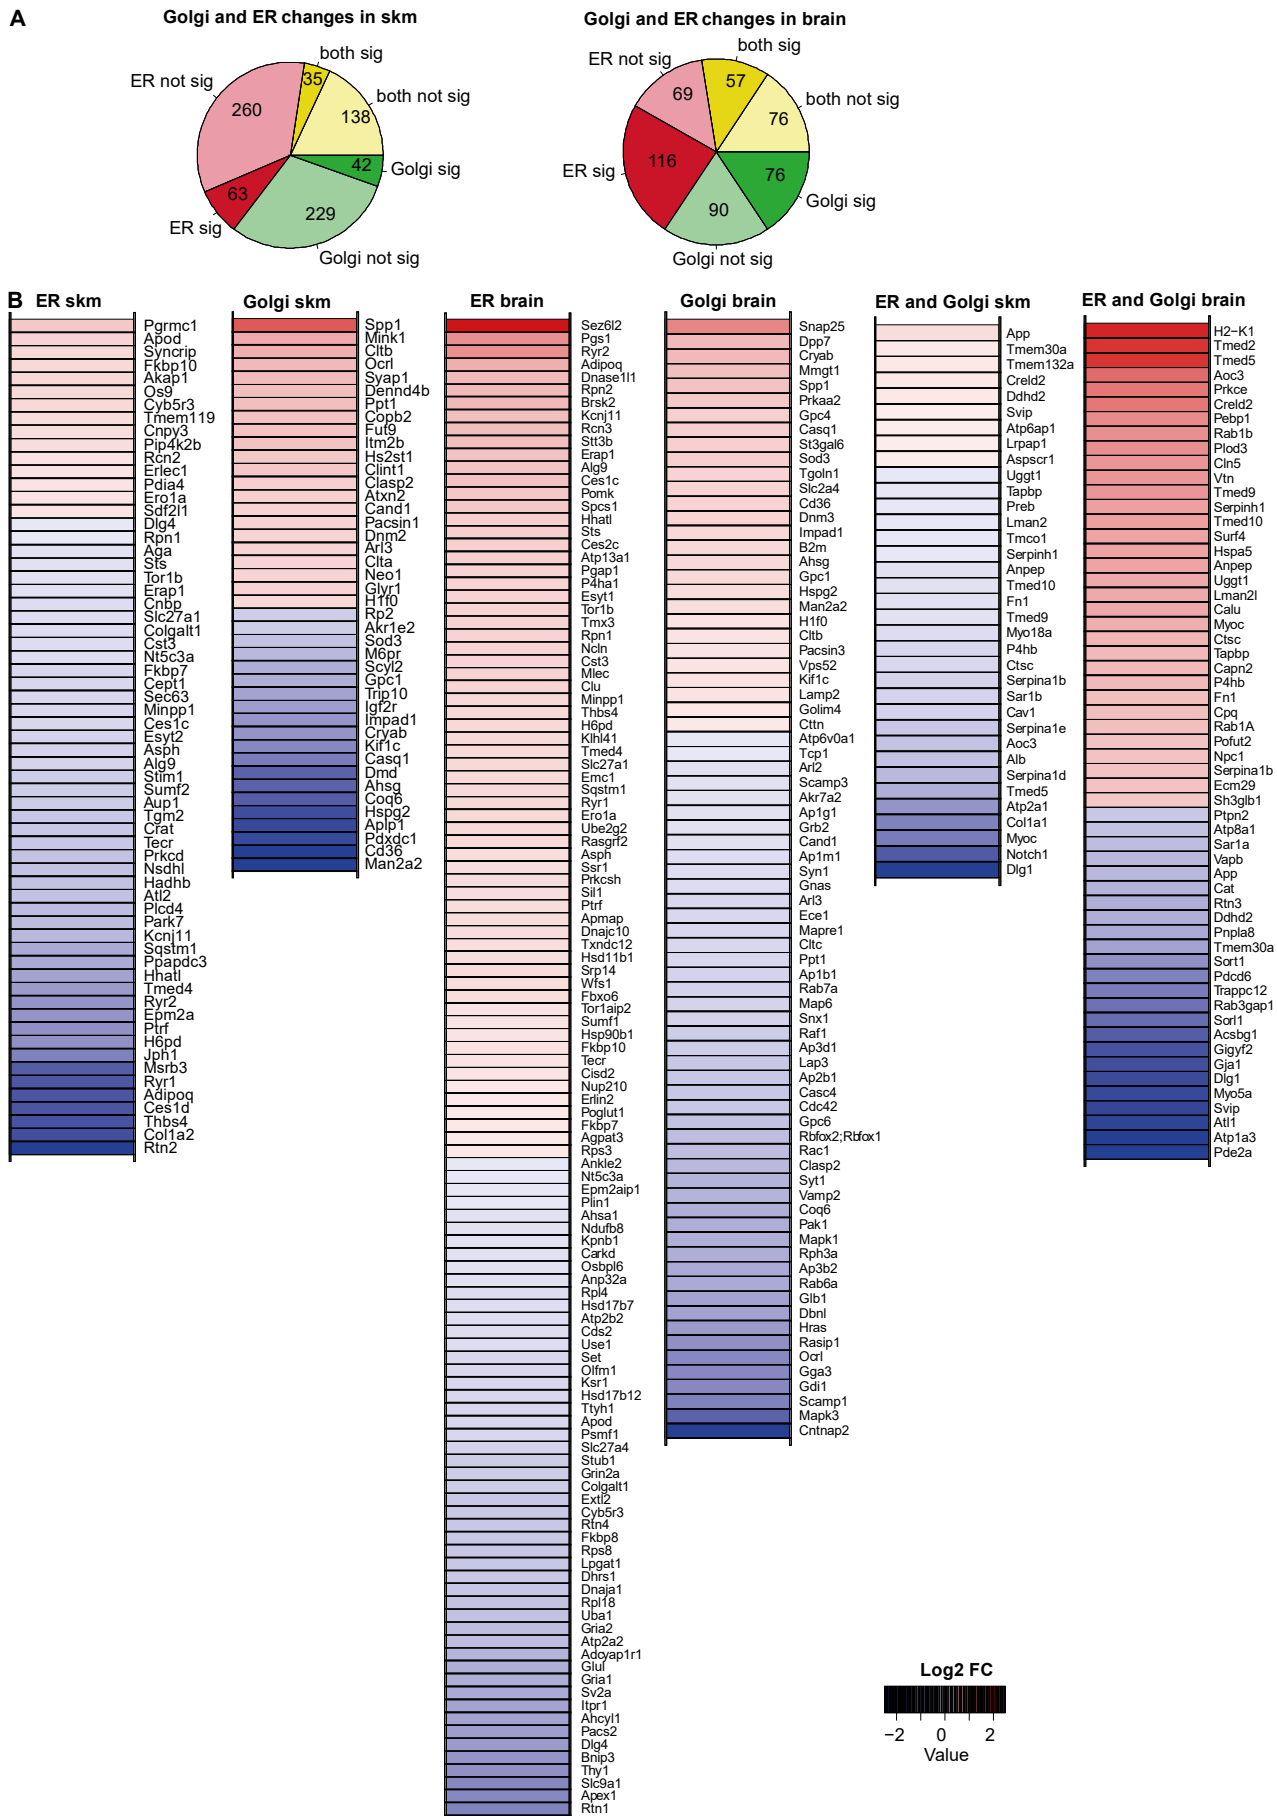

Supplementary Figure S1. Quantitative changes of proteins necessary for ER and Golgi organization and function in GMPPA KO skeletal muscle and brain compared to WT upon Con A pulldown. A) Pie chart for altered ER- and Golgi-resident proteins

in skeletal muscle (skm) and brain of GMPPA KO mice after Con A enrichment. Significant (sig) values show a q-value below 0.05 and an absolute fold change (Log2 FC) above 0.5. Proteins significantly up-regulated between WT and GMPPA KO are shown in red and those down-regulated in blue (n = 3 mice per group). **B)** Depicted are heatmaps for all significantly altered (q-value below 0.05 and fold change above 0.5 or below -0.5) proteins resident in ER and/or Golgi apparatus for skm and brain tissue of GMPPA KO mice after Con A pulldown (n=3 mice per group).

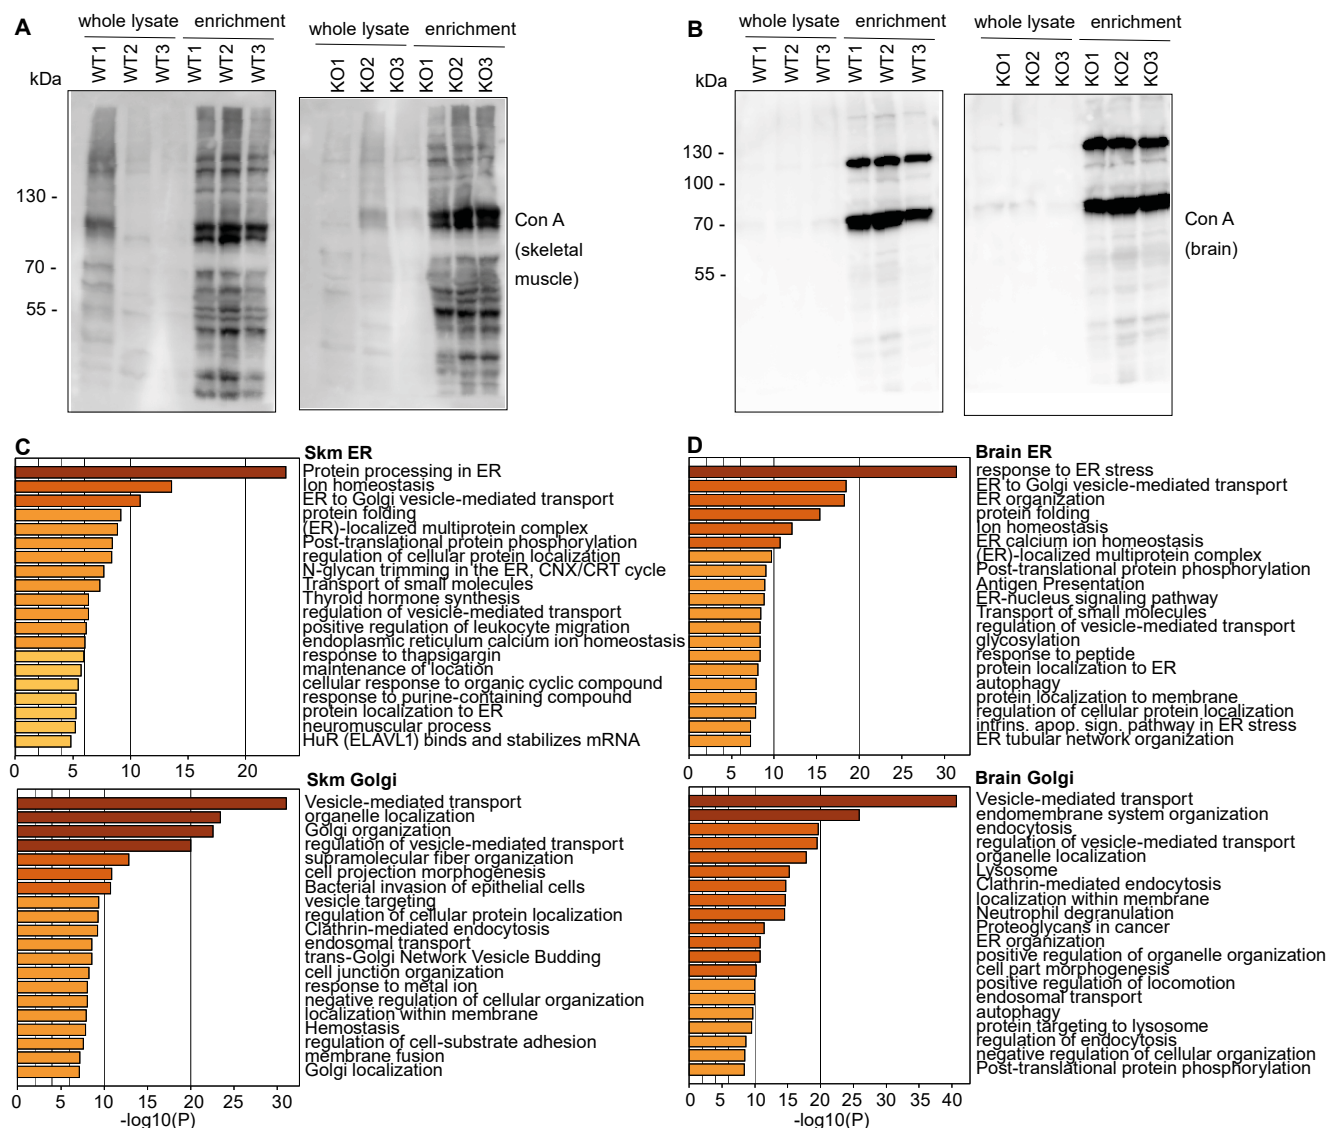

**Supplementary Figure S2. Affected pathways upon Con A pulldown in GMPPA KO mice. A-B)** Western Blot membranes probed for Con A for whole tissue samples as well as after Con A enrichment. **A)** Membranes showing skeletal muscle samples. **B)** Membranes showing brain samples. **C-D)** Metascape analysis for involved biological processes for all in the Con A pulldown identified proteins with a q-value below 0.05 for: **C)** ER-resident and Golgi-resident proteins in skm. **D)** ER-resident and Golgi-resident proteins in brain.



**Supplementary Figure S3. Protein interaction network of Con A enriched proteins necessary for ER and Golgi function and organization.** Depicted are identified protein interactions via Metascape analysis of proteins from skeletal muscle and brain selected for the pathways shown in Figure 2 and 3.

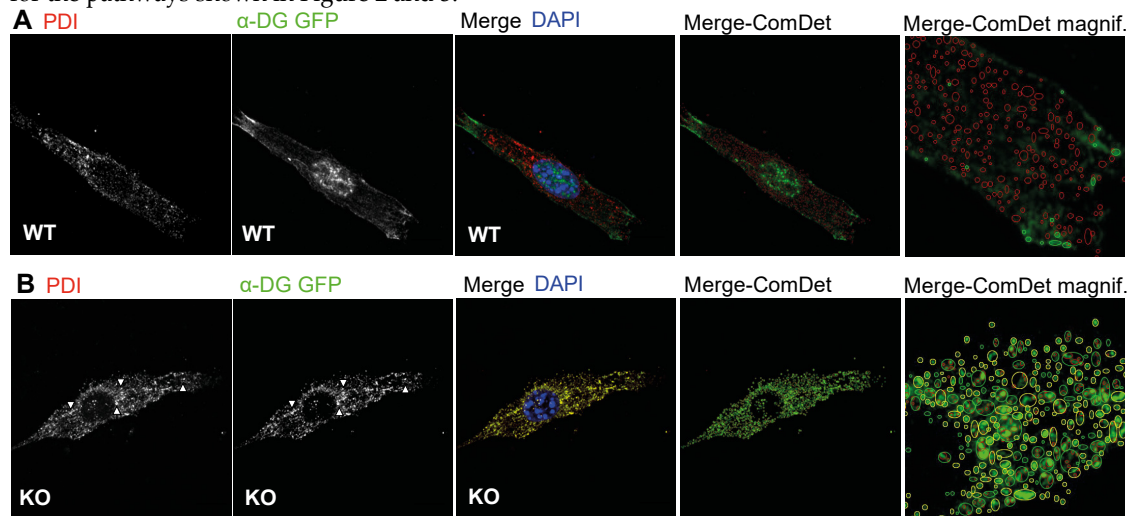

**Supplementary Figure S4. Example for ComDet analysis in ImageJ.** A-B) Representative images (displayed in Figure 4) and the according ComDet plugin analysis with magnifications of **A)** WT and **B)** GMPPA KO MEFs transfected with  $\alpha$ -DG-GFP and stained for PDI (scale bars: 8  $\mu$ m). White arrows indicate colocalized structures. Green circles:  $\alpha$ -DG-GFP detected structures. Red circles: Detected structures for PDI. Yellow circles: detected structures with colocalization of PDI and  $\alpha$ -DG-GFP.

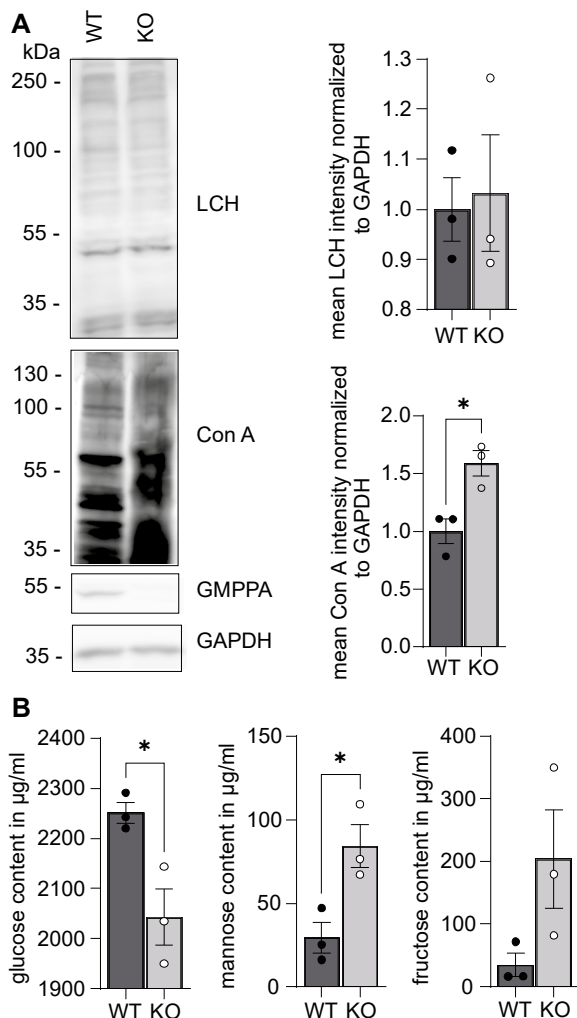

**Supplementary Figure S5. Mannose levels are increased in the supernatant of GMPPA KO MEFs.** A) Representative Western Blot images for the lens culinaris lectin (LCH) and the concanavalin A lectin (Con A) with according analysis (n=3 experiments per group).

GMPPA served for genotype verification and GAPDH as loading control (n=3 experiments per group). **B)** Mannose, glucose and fructose detection in the supernatant of WT and GMPPA KO MEFs (n=3 experiments per group). Two-tailed Student's T-Test.

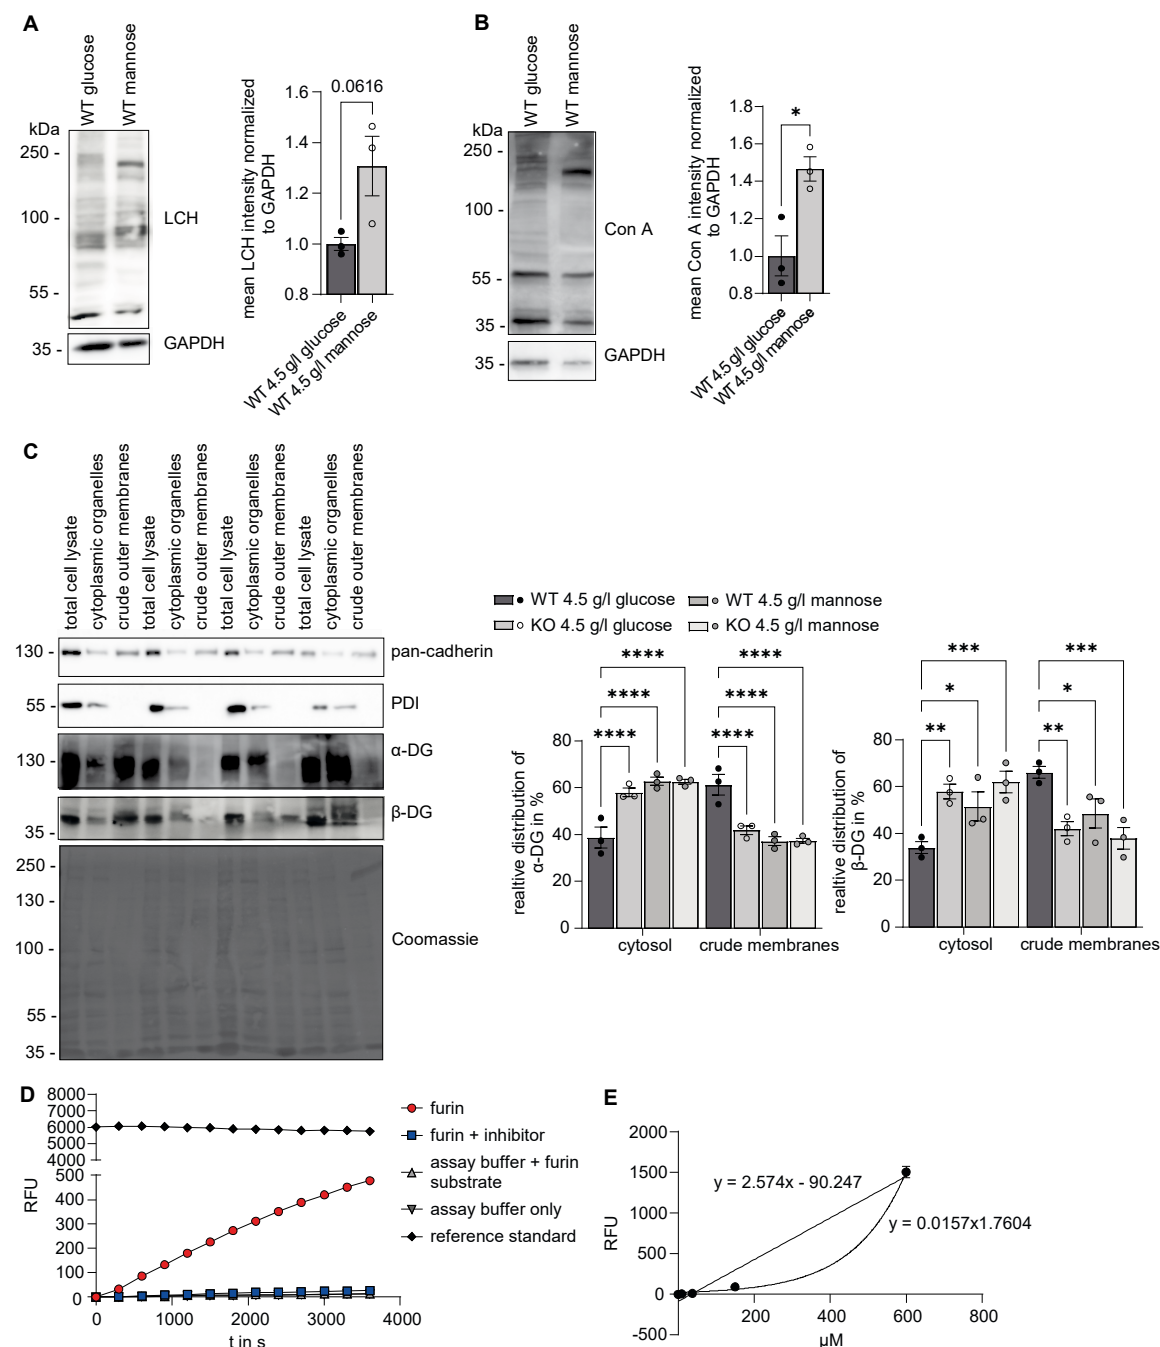

**Supplementary Figure S6. Increased mannosylation in WT MEFs treated with mannose.** **A)** Representative Western Blot analysis with the lens culinaris lectin (LCH) with according analysis (n=3 experiments per group). GAPDH served as loading control. Two-tailed Student's T-Test. **B)** Representative Western Blot membranes with the concanavalin A lectin (Con A) with according analysis (n=3 experiments per group). GAPDH served as loading control. Two-tailed Student's T-Test. **C)** Western Blot analysis of subcellular fractionation with according analysis of  $\alpha$ - and  $\beta$ -DG distribution (n=3 experiments per group). 2-way-ANOVA with Bonferroni post-hoc analysis. Coomassie blue staining served as loading control, pan-cadherin served as a marker of the plasma membrane and PDI served as a marker for the cytoplasmic organelle fraction. WT and GMPPA KO cells were transfected with a dystroglycan construct, treated with either glucose (4.5 g/l) or mannose (4.5 g/l) and then fractionated. **D-E)** Furin activity reference curves. **D)** Verification of the furin activity assay: Recombinant furin shows an increase in relative fluorescence units (RFU) with increasing time, which is absent in substrate controls. A fluorescence standard that resembles cleaved furin substrate showed a slight decrease in RFU over time. **E)** Dilution series of recombinant furin enzyme after incubation with furin substrate for 40 min.
